# Supplementary material
Source: publisher figshare collection journal article supplement (https://acs.figshare.com/ndownloader/files/16252205)
Supplement: Supplementary file 1 [file 16252205]

## Supporting Information

# Photocatalytic Activation and Reduction of CO<sub>2</sub> to CH<sub>4</sub> over Single Phase Nano Cu<sub>3</sub>SnS<sub>4</sub>: A Combined Experimental and Theoretical Study

*Neha Sharma,<sup>#,a</sup> Tilak Das,<sup>#,a</sup> Santosh Kumar,<sup>b</sup> Reshma Bhosale<sup>\*,a</sup> Mukul Kabir<sup>a</sup> and Satishchandra Ogale<sup>\*,a</sup>*

<sup>a</sup>Department of Physics and Centre for Energy Science, Indian Institute of Science Education and Research (IISER), Pune, Dr. Homi Bhabha Road, Pune, 411008, India.

<sup>b</sup>Department of Chemical Engineering, University of Bath, Claverton, Bath BA2 7AY, U.K.

<sup>#</sup> Authors have equal contribution.

### \*Corresponding Authors

E-mail: [reshmabhosale10@gmail.com](mailto:reshmabhosale10@gmail.com)

E-mail: [satishogale@gmail.com](mailto:satishogale@gmail.com), [satishogale@iiserpune.ac.in](mailto:satishogale@iiserpune.ac.in)

## SI 1: Tauc plot

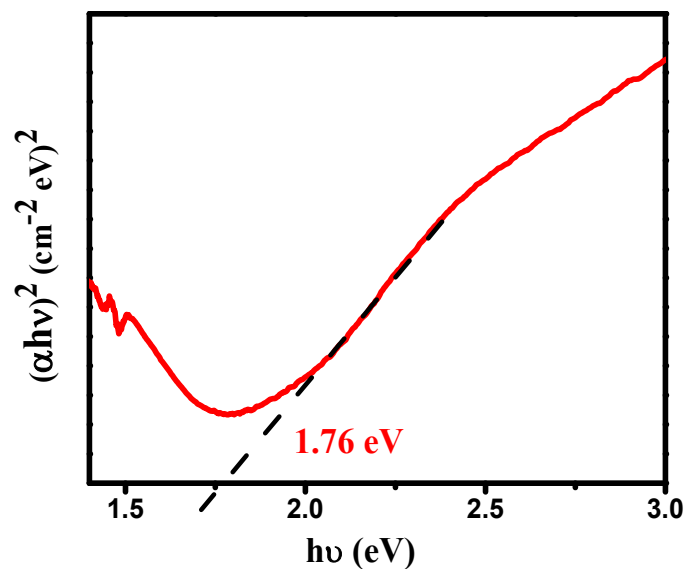

Figure S1: Tauc Plot.

## SI 2: Photocatalytic Experiment

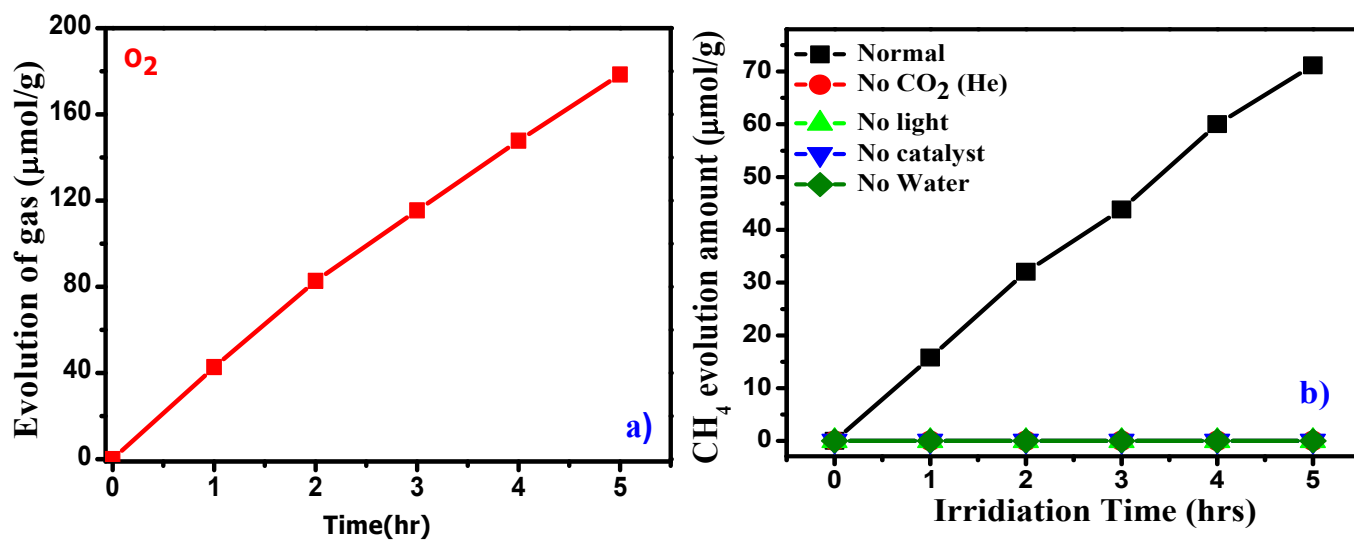

Figure S2: a) O<sub>2</sub> evolution with time b) Control experiment of photocatalytic CO<sub>2</sub> reduction over CTS

After 5 hours of amount of gas evolution is given:

1) Amount of CO = 42.4  $\mu\text{mol/g}$

2) Amount of CH<sub>4</sub> = 71.2  $\mu\text{mol/g}$

3) Amount of H<sub>2</sub> = 31.4  $\mu\text{mol/g}$

4) Amount of O<sub>2</sub> = 178.4  $\mu\text{mol/g}$ .

Equations involved in photocatalytic reactions:

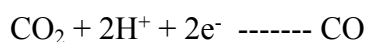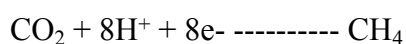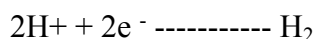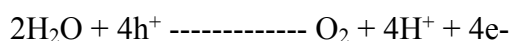

Therefore, as per above equations, electrons are consumed in production of reduced products and each corresponding reduction reaction generates O<sub>2</sub> by consumption of holes. Hence, the evolution of O<sub>2</sub> (178.4  $\mu\text{mol/g}$ ) is summation of overall O<sub>2</sub> produced from oxidation reactions. In this respect the stoichiometric ratio of (CO+H<sub>2</sub>): O<sub>2</sub> is 1:2 and for CH<sub>4</sub>: O<sub>2</sub> ratio is 1:2. The calculated O<sub>2</sub> evolved corresponding to CO and H<sub>2</sub> evolution reaction is 73.8  $\mu\text{mol/g}$  where as O<sub>2</sub> evolution corresponding to CH<sub>4</sub> evolution is 142.4  $\mu\text{mol/g}$ . So overall, theoretically calculated evolved O<sub>2</sub> is 179.3  $\mu\text{mol/g}$ . Experimentally by photocatalytic CO<sub>2</sub> reduction over CTS we obtained 178.4  $\mu\text{mol/g}$  which is almost equivalent to theoretically calculated O<sub>2</sub>. This indicates that stoichiometrically products are produced and water is consumed as a reducing agent.

### **S3: Density Functional Theory and Methodology**

The crystal structure of the Cu<sub>3</sub>SnS<sub>4</sub> (CTS) bulk phases was fully optimized using plane-wave based DFT code Vienna Ab-initio Simulation Package (VASP)<sup>1,2</sup> within the Perdew-Burke-

Ernzerhof (PBE) formulation of the exchange-correlation energy.<sup>3</sup> The core electrons have been approximated with projector augmented wave method (PAW)<sup>3,4</sup> as implemented in VASP pseudopotentials and valence electrons have been treated with plane wave basis set with energy cut-off 650 eV. The valence configuration have been considered carefully with 17 electrons for Cu ( $3p^6 3d^{10} 4s^1$ ), 14 electrons for Sn ( $4d^{10} 5s^2 5p^2$ ) and 6 electrons for S ( $3s^2 3p^4$ ), 6 electrons for O ( $2s^2 2p^4$ ), 4 electrons for C ( $2s^2 2p^2$ ), and 1 electron for H ( $1s^1$ ) atoms. The energy convergence during the self-consistent cycle using the conjugate gradient algorithm was ensured with convergence threshold criteria  $1 \times 10^{-6}$  eV and force convergence was set to  $1 \times 10^{-3}$  eV/Å. The Monk horst-Pack k-point mesh of size  $6 \times 8 \times 8$  sampling was used for structural optimization for bulk phase calculations.<sup>5</sup> The optimized (experimental) lattice parameters of the bulk phase of  $\text{Cu}_3\text{SnS}_4$  by using PBE-GGA functional are  $a = 7.585 \text{ \AA}$  ( $7.530 \text{ \AA}$ ),  $b = 6.568 \text{ \AA}$  ( $6.604 \text{ \AA}$ ) and  $c = 6.317 \text{ \AA}$  ( $6.313 \text{ \AA}$ ) with almost negligible volume changes ( $\sim 1\%$ ) compared to the known experimental data.

Over the VASP optimized bulk crystal of CTS, the XPS simulation were performed using the full-potential linearized augmented plane-wave plus local orbital code WIEN2K<sup>6</sup> for confirmation of the presence of  $\text{Cu}^{1+}$  and  $\text{Cu}^{2+}$  ion types of Cu in the bulk phase (we call them Cu1 and Cu2, now on). The convergence parameters and muffin-tin radii of the elements were chosen by default values and calculated DOS watch matched with PAW PBE-GGA data. A k-mesh size  $4 \times 4 \times 4$  was enough to reach convergence for the all XPS simulations of the core-hole over the  $2 \times 2 \times 2$  supercell of the bulk structure. In our core-hole calculations, we have explicitly removed one core electron from the target atom and placed in the conduction band. Here, we have only simulated for  $L_2$  edge of the Cu1 and Cu2 atom of CTS and compared with experimental data. And, hence for this purpose the computed data are broadened and shifted according to experimental input.

Experimentally, XPS of S 2p spectrum shows two peaks i.e.  $2p_{3/2}$  (162 eV) and  $2p_{1/2}$  (163.3 eV) as given in Figure S3a which is indicating S in  $S^{2-}$  oxidation state. The spin-orbit doublet of Sn 3d spectrum was observed with two peaks of Sn  $3d_{5/2}$  (487.3 eV) and Sn  $3d_{3/2}$  (495.6 eV) to be deconvoluted into two peaks each (Figure S3b). This indicates that Sn exists in both 2+ and 4+ oxidation states.

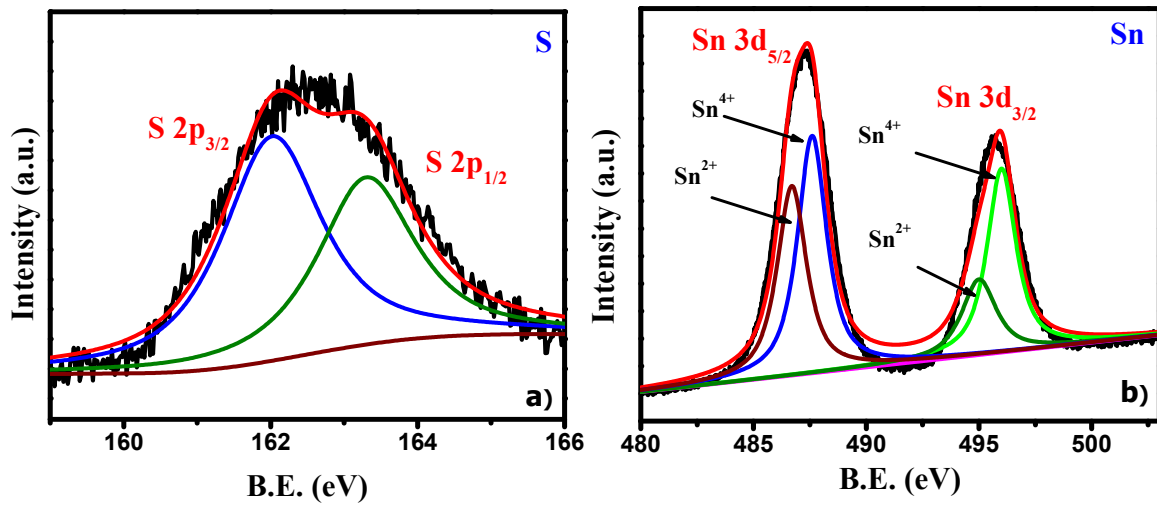

**Figure S3:** XPS spectra of a) Sulphur (S); b) Tin (Sn) of CTS

## S4: Surface Energy Calculations

The optimized lattice parameters of the bulk phase were used for simulating the  $2 \times 2$  surface of the  $Cu_3SnS_4$  with full chemical stoichiometry of the material with 2 unit-cell thickness to form a slab model of it (total 64 atoms). The surface energies were estimated for both metal (Cu-Sn) and non-metal (S) terminated facet along the  $\langle 001 \rangle$  direction. The surface energy was computed and estimated with the following formula:

$$E_s = 1/A \times (E_{slab} - N_s \times E_{bulk}) \dots \dots \dots (1)$$

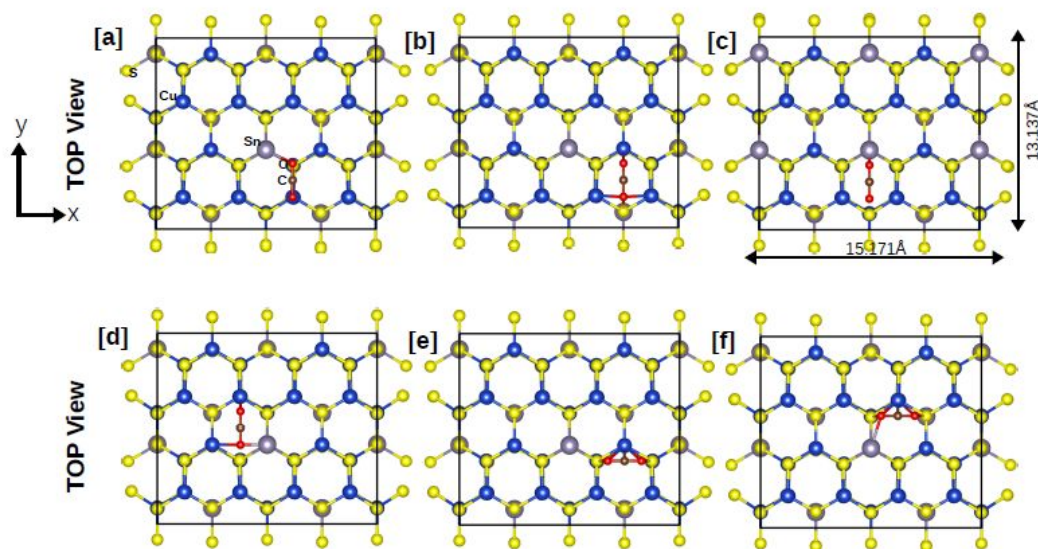

**Figure S4:** The models of  $2 \times 2$  hybrid surface of CTS along  $\langle 001 \rangle$  with  $\text{CO}_2$  adsorbed. Cu, Sn, S, C and O atoms are marked with blue, gray, yellow, brown, and red colour balls, respectively.

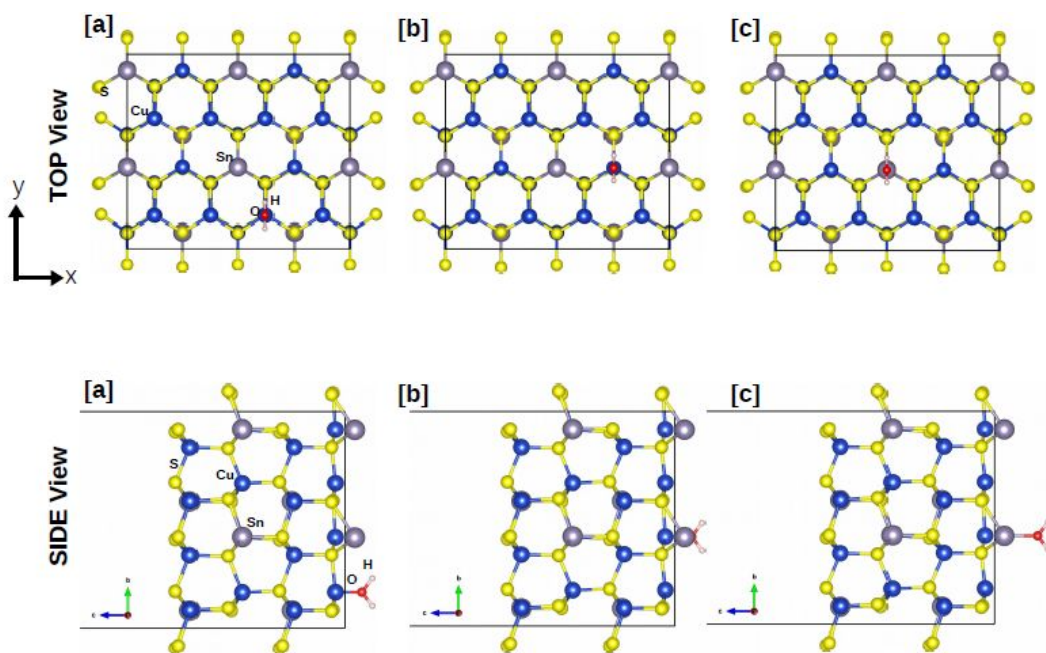

**Figure S5:** The models of  $2 \times 2$  hybrid surface of CTS along  $\langle 001 \rangle$  with  $\text{H}_2\text{O}$  adsorbed. The Cu, Sn, and S atoms are marked in the same ways like the previous with additional O and H atoms are shown in small red and white color balls.

where,  $E_s$  is calculated surface energy of the model,  $E_{slab}$  is total energy of the pristine slab,  $E_{bulk}$  is total energy per atom of the bulk  $\text{Cu}_3\text{SnS}_4$  and  $N_s$  is total number of atoms in the slab,  $A$  is the in-plane surface area of the model pristine slab. For the slab models, the vacuum was chosen to be more than  $20\text{\AA}$  and a Monkhorst-Pack k-point mesh of size  $4 \times 6 \times 1$  grid was used for the simulation of the selective atomic positions relaxation of top two layers of  $2 \times 2$  slab of CTS and post processing of the binding energies of  $\text{CO}_2$  and  $\text{H}_2\text{O}$  over the metal terminated surface of it.

The details of the surface energies estimation of the CTS are given in our previous research work.<sup>7</sup> The nature of surface  $\text{CO}_2$  and  $\text{H}_2\text{O}$  adsorption were checked with the PBE-GGA+D3 calculations, which includes van der Waals (vdW) dispersion energies corrections in an empirical way as implemented in D3 approach in VASP code.<sup>8,9</sup>

**Table S1:** The calculated binding energies of  $\text{CO}_2$  and  $\text{H}_2\text{O}$  adsorption on the metal terminated surface of CTS from PBE-GGA+D3 calculations.

| Models of $\text{CO}_2$ |                                              | Models of $\text{H}_2\text{O}$ |                                              |
|-------------------------|----------------------------------------------|--------------------------------|----------------------------------------------|
| <i>Model No.</i>        | <i>Binding Energy, <math>E_b</math> (eV)</i> | <i>Model No.</i>               | <i>Binding Energy, <math>E_b</math> (eV)</i> |
| [a]                     | -0.135                                       | [a]                            | -0.210                                       |
| [b]                     | -0.660                                       | [b]                            | -0.220                                       |
| [c]                     | -0.056                                       | [c]                            | +0.085                                       |
| [d]                     | -0.107                                       |                                |                                              |
| [e]                     | -0.087                                       |                                |                                              |
| [f]                     | -0.115                                       |                                |                                              |

The binding energies of the individual case of the  $\text{CO}_2$  or  $\text{H}_2\text{O}$  were measured theoretically using the formula,

$$E_b = (E_{hy} - E_{slab} - E_{gas} + \Delta ZPE) \dots \dots (2)$$

where  $E_b$ ,  $E_{hy}$ ,  $E_{slab}$ ,  $E_{gas}$  and  $\Delta ZPE$  are respectively the binding energy of each gas molecule, total energy of hybrid model (i.e. either  $\text{CO}_2$  or  $\text{H}_2\text{O}$  or both attached to the surface of CTS),

total energy of the pristine slab of CTS without gas, total energy of gas molecule without slab within the model and change in zero-point energies calculated using the vibrational frequencies. The details of the all possible model of CO<sub>2</sub> and H<sub>2</sub>O adsorption sites are shown in the **Figure S4 and S5**, respectively. The calculated binding energies of these models are shown in the **Table S1** calculated from PBE-GGA+D3 approach.

### S5: Physisorption of Isolated H<sub>2</sub>O Molecule over CTS Surface

All possible models those are used in our study of the H<sub>2</sub>O adsorption over the CTS surface for PBE-GGA+D3 optimization are given in **Figure S5-S7**. Here we have shown models with the most favourable binding energy from our calculations as mentioned in the Table S1.

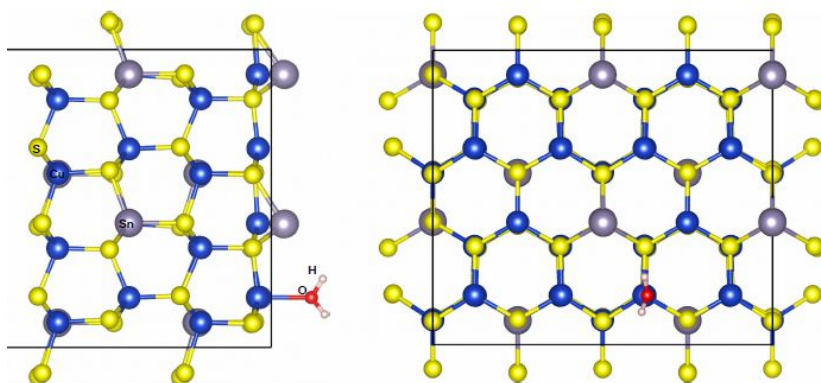

**Figure S6:** PBE-GGA+D3 functional optimized Model [a] as mentioned in Table S1 for H<sub>2</sub>O

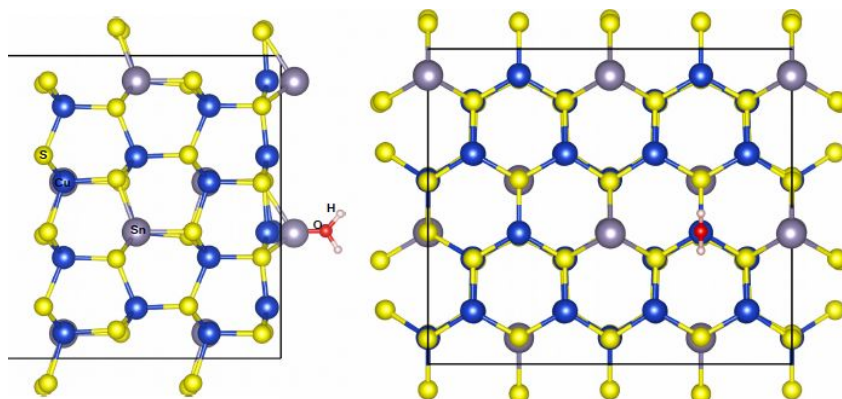

**Figure S7:** PBE-GGA+D3 functional optimized Model [b] as mentioned in Table S1 for H<sub>2</sub>O



## S6: Physisorption of Isolated CO<sub>2</sub> Molecule over CTS Surface

All possible models those are used in our study of the CO<sub>2</sub> adsorption over the CTS surface for PBE-GGA+D3 optimization are given in **Figure S8-S11**. Here we have shown models with the most favourable binding energy from our calculations as mentioned in the Table S1.

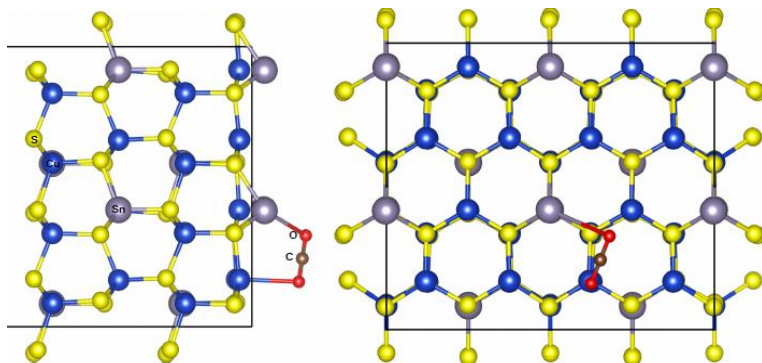

**Figure S8:** PBE-GGA+D3 functional optimized Model [a] as mentioned in Table S1 for CO<sub>2</sub>

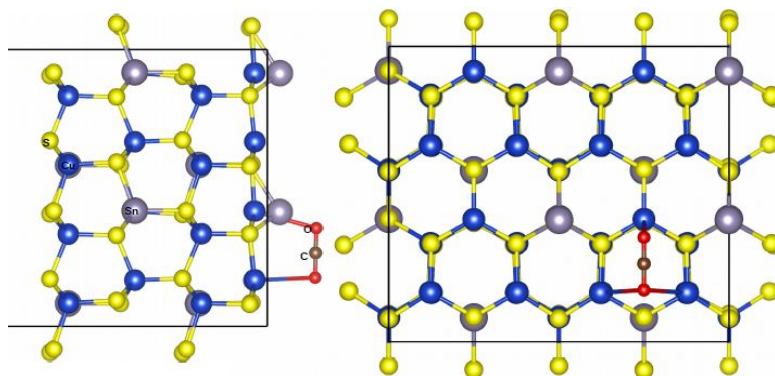

**Figure S9:** PBE-GGA+D3 functional optimized Model [b] as mentioned in Table S1 for CO<sub>2</sub>

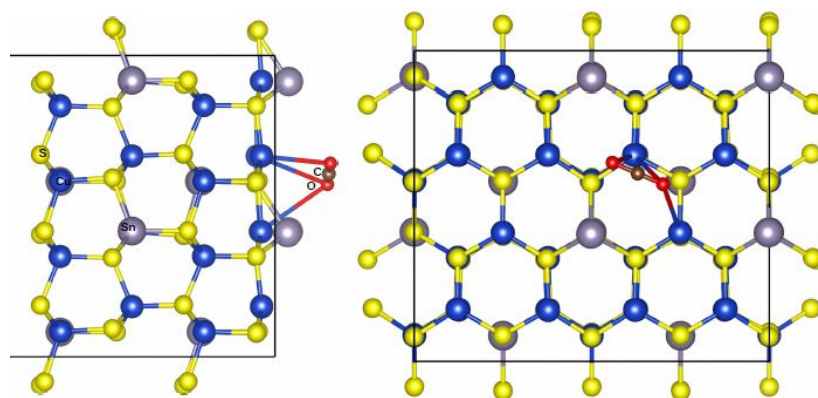

**Figure S10:** PBE-GGA+D3 functional optimized Model [d] as mentioned in Table S1 for CO<sub>2</sub>.

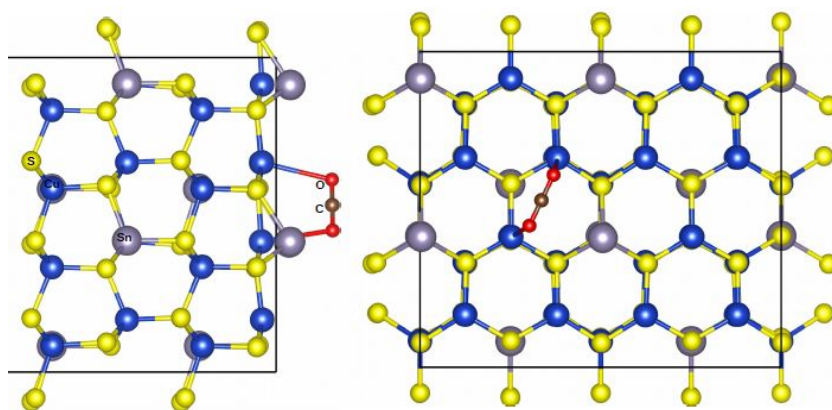

**Figure S11:** PBE-GGA+D3 functional optimized Model [f] as mentioned in Table S1 for  $\text{CO}_2$ .

### S7: Effect of $\text{H}_2\text{O}$ for Activation of $\text{CO}_2$ and Formation of $\text{HCOO}^-$

The favourable and unfavourable situation of the  $\text{CO}_2 + \text{H}_2\text{O}$  models over the CTS (001) surface geometry after PBE-GGA+D3 optimization are shown below. Calculations are done over the  $2 \times 2$  surface of the CTS as discussed earlier section, and only part of it projected for better visualization.

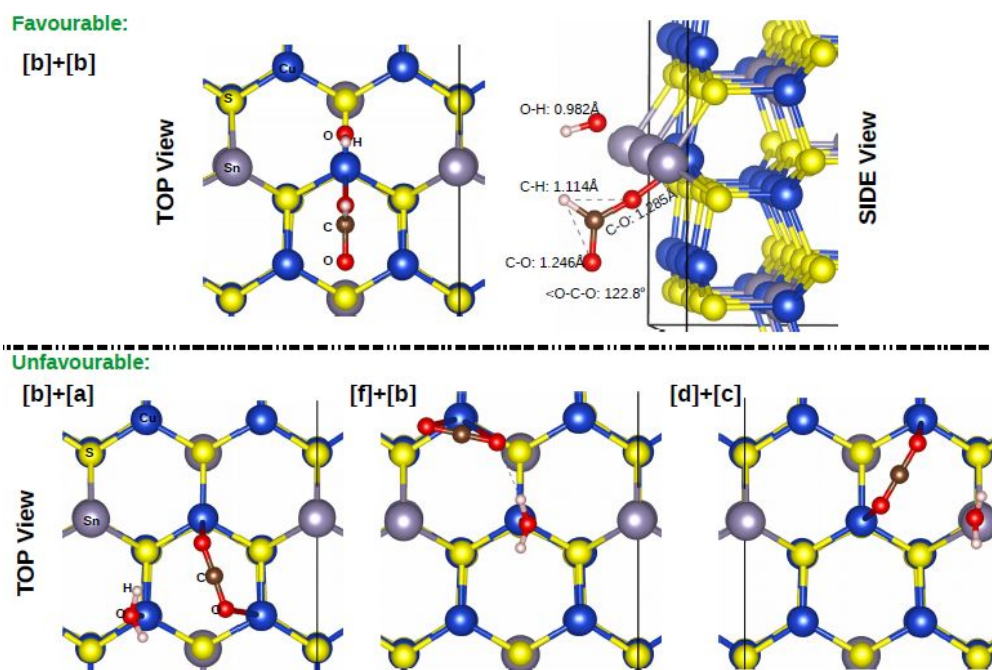

**Figure S12:** PBE-GGA+D3 functional optimized combined  $\text{CO}_2$  and  $\text{H}_2\text{O}$  models for formate pathway confirmation.

## S8: HER data

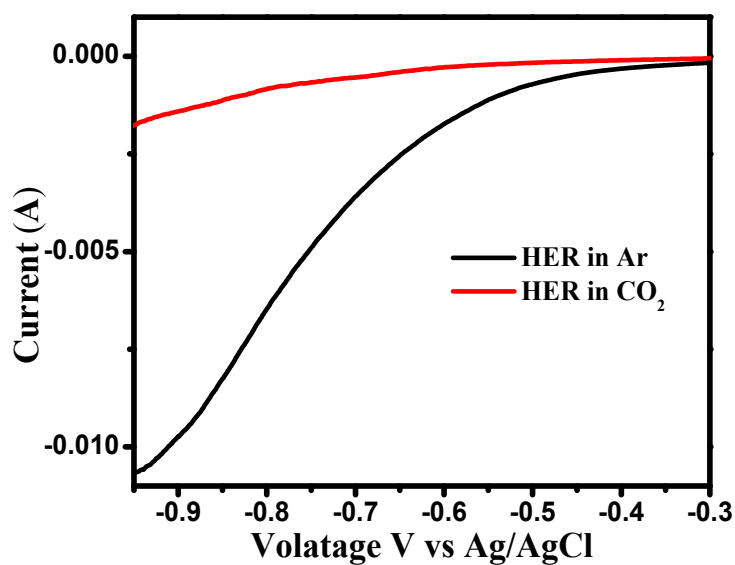

**Figure S13:** HER data of CTS in presence of  $\text{CO}_2$  and Ar.

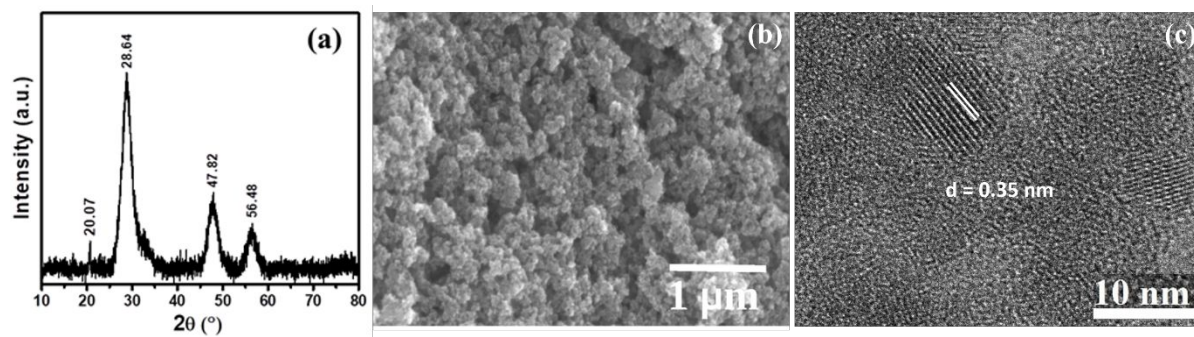

**Figure S14.** Physical characterization of CTS nanoparticles. (a) PXRD, (b) FESEM (Copyright Wiley-VCH Verlag GmbH & Co. KGaA, 2018. Reproduced with permission from Reference 7) and (c) TEM.

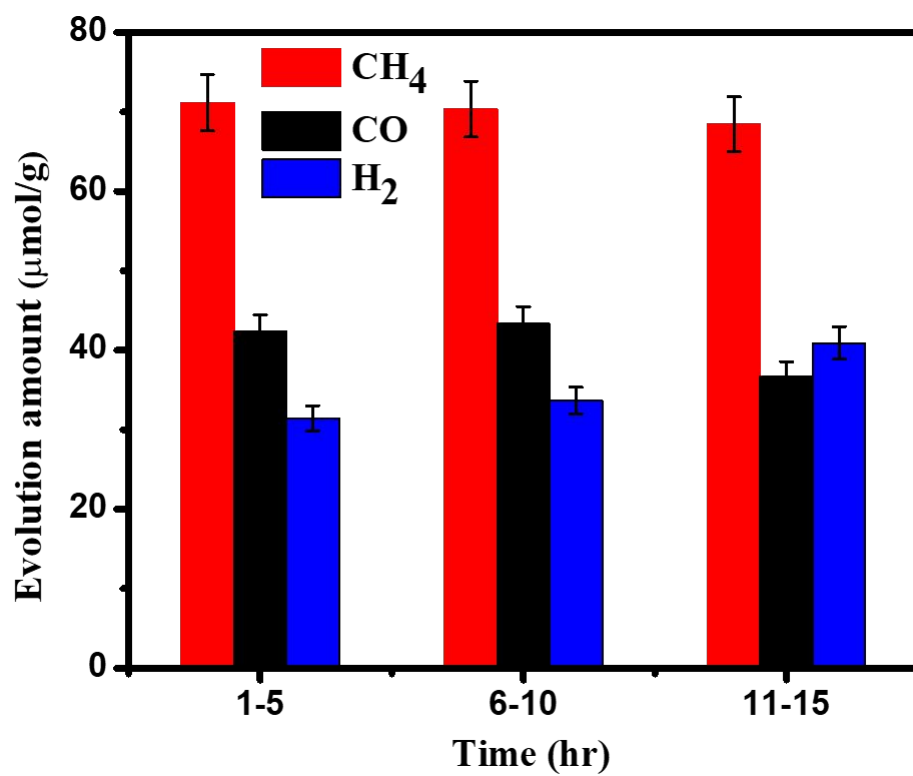

**Figure S15.** Histograms showing 5 hrs stability data with 3 repetitions for CH<sub>4</sub>, CO and H<sub>2</sub>.

**Table S2:** Table of Comparison of different sulphides based photocatalyst for photocatalytic CO<sub>2</sub> reduction

| S.No. | Photocatalyst                                                                | CH <sub>4</sub><br>( $\mu$ mol/g/hr) | CO<br>( $\mu$ mol/g/hr)                      | CH <sub>3</sub> OH<br>( $\mu$ mol/g/hr) | Selectivity<br>of products | Light source                       | Ref          |
|-------|------------------------------------------------------------------------------|--------------------------------------|----------------------------------------------|-----------------------------------------|----------------------------|------------------------------------|--------------|
| 1.    | CdS<br>CdS/WO <sub>3</sub>                                                   | 0.1<br>1.02                          |                                              |                                         | -                          | 3 W<br>LED Lamp                    | 10           |
| 2.    | CdS/ZnS                                                                      | 0.7                                  | 0.14                                         |                                         | -                          | 8 W<br>Hg Lamp UV                  | 11           |
| 3.    | CdS/enzyme                                                                   |                                      | 0.6<br>$\mu$ mol/hr*                         |                                         | -                          | 250 W<br>Tungsten-<br>Halogen Lamp | 12           |
| 4.    | CdS<br>CdS/Graphene                                                          | 0.2<br>3                             | 0.14<br>0.3                                  |                                         | -                          | -                                  | 13           |
| 5.    | CdS/Ni                                                                       |                                      | 3<br>$\mu$ mol/hr*                           |                                         | 90%                        | 100 mW/cm <sup>2</sup>             | 14           |
| 6.    | Cd/ZnS                                                                       | -                                    | 81.3                                         |                                         | -                          | 200 W<br>Hg-Xe Lamp                | 15           |
| 7.    | CdS/MOF                                                                      |                                      | 50.4<br>$\mu$ mol*                           |                                         | 50%                        | 420 nm<br>LED Lamp                 | 16           |
| 8.    | Bi <sub>2</sub> S <sub>3</sub>                                               |                                      |                                              | 20                                      | -                          | 300 W<br>Xe Lamp                   | 17           |
| 9.    | Bi <sub>2</sub> S <sub>3</sub><br>CdS<br>Bi <sub>2</sub> S <sub>3</sub> /CdS |                                      |                                              | 40<br>20<br>70                          | -                          | 500 W<br>Xe Lamp                   | 18           |
| 10.   | BCN<br>BCN/CdS                                                               |                                      | 30<br>160                                    |                                         | 85%                        | 300 W<br>Xe Lamp                   | 19           |
| 11.   | CdS<br>CdS/Ag/rGO                                                            |                                      | 0.3<br>$\mu$ mol/hr*<br>1.5<br>$\mu$ mol/hr* |                                         | 38%                        | 300 W<br>Xe Lamp                   | 20           |
| 12.   | CdS<br>CdS/rGO                                                               | 0.21<br>2.51                         |                                              |                                         | -                          | 3 W<br>LED Lamp                    | 21           |
| 13.   | TiO <sub>2</sub><br>CuInS <sub>2</sub> /TiO <sub>2</sub>                     | 1.25<br>2.5                          |                                              | 0.7<br>0.86                             | -                          | 350 W<br>Xe Lamp                   | 22           |
| 14.   | CTS                                                                          | 14                                   | 8.5                                          |                                         | 80%                        | 300 W<br>Xe lamp                   | This<br>Work |

\*mg of catalyst not available.

## References

- (1) Kresse, G.; Hafner, J. Ab Initio Molecular Dynamics for Liquid Metals. *Phys. Rev. B* **1993**, *47* (1), 558–561.
- (2) Kresse, G.; Furthmüller, J. Efficient Iterative Schemes for Ab Initio Total-Energy Calculations Using a Plane-Wave Basis Set. *Phys. Rev. B* **1996**, *54* (16), 11169–11186.
- (3) Kresse, G.; Joubert, D. From Ultrasoft Pseudopotentials to the Projector Augmented-Wave Method. *Phys. Rev. B* **1999**, *59* (3), 1758–1775.
- (4) Perdew, J. P.; Burke, K.; Ernzerhof, M. Generalized Gradient Approximation Made Simple. *Phys. Rev. Lett.* **1996**, *77* (18), 3865–3868.
- (5) Heyd, J.; Scuseria, G. E.; Ernzerhof, M. Hybrid Functionals Based on a Screened Coulomb Potential. *J. Chem. Phys.* **2003**, *118* (18), 8207–8215.
- (6) Blaha, P.; Schwarz, K.; Madsen, G. K. H.; Kvasnicka, D.; Luitz, J. *{WIEN2K}, {A}n {A}ugmented {P}lane {W}ave + {L}ocal {O}rbitals {P}rogram for {C}alculating {C}rystal {P}roperties*; {K}arlheinz Schwarz, Techn. Universität Wien, Austria, 2001.
- (7) M, T.; Sharma, N.; Das, T.; Varhade, S.; Badadhe, S. S.; Thotiyl, M. O.; Kabir, M.; Ogale, S. A Combined Experimental and Computational Study of Gas Sensing by Cu<sub>3</sub>SnS<sub>4</sub> Nanoparticulate Film: High Selectivity, Stability, and Reversibility for Room Temperature H<sub>2</sub>S Sensing. *Adv. Mater. Interfaces* **2018**, *5* (10), 1701492–1701500.
- (8) Grimme, S.; Ehrlich, S.; Goerigk, L. Effect of the Damping Function in Dispersion Corrected Density Functional Theory. *J. Comput. Chem.* **2011**, *32* (7), 1456–1465.
- (9) Grimme, S.; Antony, J.; Ehrlich, S.; Krieg, H. A Consistent and Accurate Ab Initio Parametrization of Density Functional Dispersion Correction (DFT-D) for the 94 Elements H-Pu. *J. Chem. Phys.* **2010**, *132* (15), 154104.
- (10) Jin, J.; Yu, J.; Guo, D.; Cui, C.; Ho, W. A Hierarchical Z-Scheme CdS-WO<sub>3</sub> Photocatalyst with Enhanced CO<sub>2</sub> Reduction Activity. *Small* **2015**, *11* (39), 5262–5271.
- (11) Kočí, K.; Praus, P.; Edelmannová, M.; Ambrožová, N.; Troppová, I.; Fridrichová, D.; Słowik, G.; Ryczkowski, J. Photocatalytic Reduction of CO<sub>2</sub> Over CdS, ZnS and Core/Shell CdS/ZnS Nanoparticles Deposited on Montmorillonite. *J. Nanosci. Nanotechnol.* **2017**, *17* (6), 4041–4047.
- (12) Chaudhary, Y. S.; Woolerton, T. W.; Allen, C. S.; Warner, J. H.; Pierce, E.; Ragsdale, S. W.; Armstrong, F. A. Visible Light-Driven CO<sub>2</sub> reduction by Enzyme Coupled CdS Nanocrystals. *Chem. Commun.* **2012**, *48* (1), 58–60.

- (13) Cho, K. M.; Kim, K. H.; Park, K.; Kim, C.; Kim, S.; Al-Saggaf, A.; Gereige, I.; Jung, H. T. Amine-Functionalized Graphene/CdS Composite for Photocatalytic Reduction of CO<sub>2</sub>. *ACS Catal.* **2017**, 7 (10), 7064–7069.
- (14) Kuehnel, M. F.; Orchard, K. L.; Dalle, K. E.; Reisner, E. Selective Photocatalytic CO<sub>2</sub> Reduction in Water through Anchoring of a Molecular Ni Catalyst on CdS Nanocrystals. *J. Am. Chem. Soc.* **2017**, 139 (21), 7217–7223.
- (15) Meng, X.; Yu, Q.; Liu, G.; Shi, L.; Zhao, G.; Liu, H.; Li, P.; Chang, K.; Kako, T.; Ye, J. Efficient Photocatalytic CO<sub>2</sub> Reduction in All-Inorganic Aqueous Environment: Cooperation between Reaction Medium and Cd(II) Modified Colloidal ZnS. *Nano Energy* **2017**, 34 (Ii), 524–532.
- (16) Wang, S.; Wang, X. Photocatalytic CO<sub>2</sub> reduction by CdS Promoted with a Zeolitic Imidazolate Framework. *Appl. Catal. B Environ.* **2015**, 162, 494–500.
- (17) Jin, J.; He, T. Facile Synthesis of Bi<sub>2</sub>S<sub>3</sub> Nanoribbons for Photocatalytic Reduction of CO<sub>2</sub> into CH<sub>3</sub>OH. *Appl. Surf. Sci.* **2017**, 394, 364–370.
- (18) Li, X.; Chen, J.; Li, H.; Li, J.; Xu, Y.; Liu, Y.; Zhou, J. Photoreduction of CO<sub>2</sub> to Methanol over Bi<sub>2</sub>S<sub>3</sub>/CdS Photocatalyst under Visible Light Irradiation. *J. Nat. Gas Chem.* **2011**, 20 (4), 413–417.
- (19) Zhou, M.; Wang, S.; Yang, P.; Huang, C.; Wang, X. Boron Carbon Nitride Semiconductors Decorated with CdS Nanoparticles for Photocatalytic Reduction of CO<sub>2</sub>. *ACS Catal.* **2018**, 8 (6), 4928–4936.
- (20) Zhu, Z.; Han, Y.; Chen, C.; Ding, Z.; Long, J.; Hou, Y. Reduced Graphene Oxide-Cadmium Sulfide Nanorods Decorated with Silver Nanoparticles for Efficient Photocatalytic Reduction Carbon Dioxide Under Visible Light. *ChemCatChem* **2018**, 10 (7), 1627–1634.
- (21) Yu, J.; Jin, J.; Cheng, B.; Jaroniec, M. A Noble Metal-Free Reduced Graphene Oxide-CdS Nanorod Composite for the Enhanced Visible-Light Photocatalytic Reduction of CO<sub>2</sub> to Solar Fuel. *J. Mater. Chem. A* **2014**, 2 (10), 3407–3416.
